# Supplementary material for: Size effect of Ru particles on the self-reforming-driven hydrogenolysis of a lignin model compound
Source: Royal Society of Chemistry journal article supplement (doi:10.1039/d2cy00688j), 2022-01-01
Supplement: d2cy00688j1.pdf [file d2cy00688j1.pdf]

## Supporting Information

# **Size effect of Ru colloidal particles on the self-reforming-driven hydrogenolysis of lignin model compound**

Zhiruo Guo, Lingxiao Li, Yong Guo, Xiaohui Liu and Yanqin Wang\*

Shanghai Key Laboratory of Functional Materials Chemistry, Research Institute of Industrial Catalysis, School of Chemistry and Molecular Engineering, East China University of Science and Technology, Shanghai 200237, P. R. China.

\*Corresponding Author: [wangyanqin@ecust.edu.cn](mailto:wangyanqin@ecust.edu.cn) (Y. Q. W)

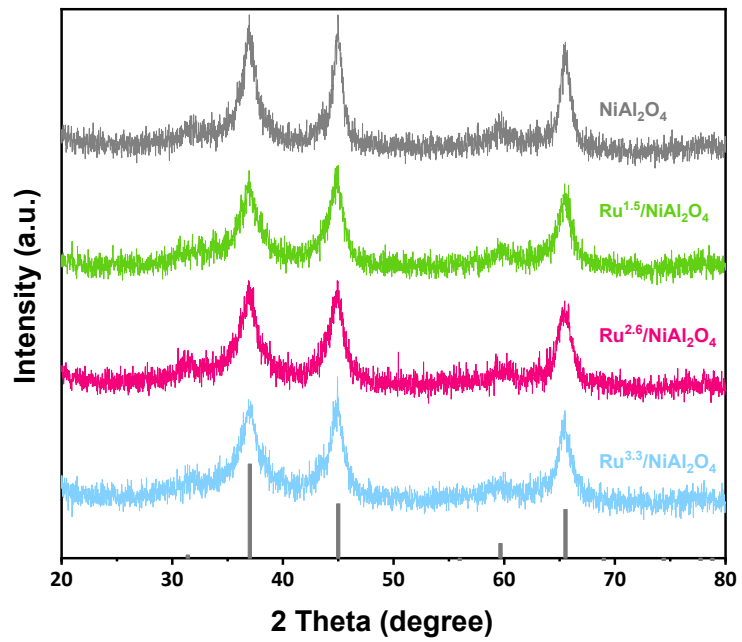

**Figure S1.** XRD patterns of NiAl<sub>2</sub>O<sub>4</sub>, Ru<sup>1.5</sup>/NiAl<sub>2</sub>O<sub>4</sub>, Ru<sup>2.6</sup>/NiAl<sub>2</sub>O<sub>4</sub> and Ru<sup>3.3</sup>/NiAl<sub>2</sub>O<sub>4</sub>.

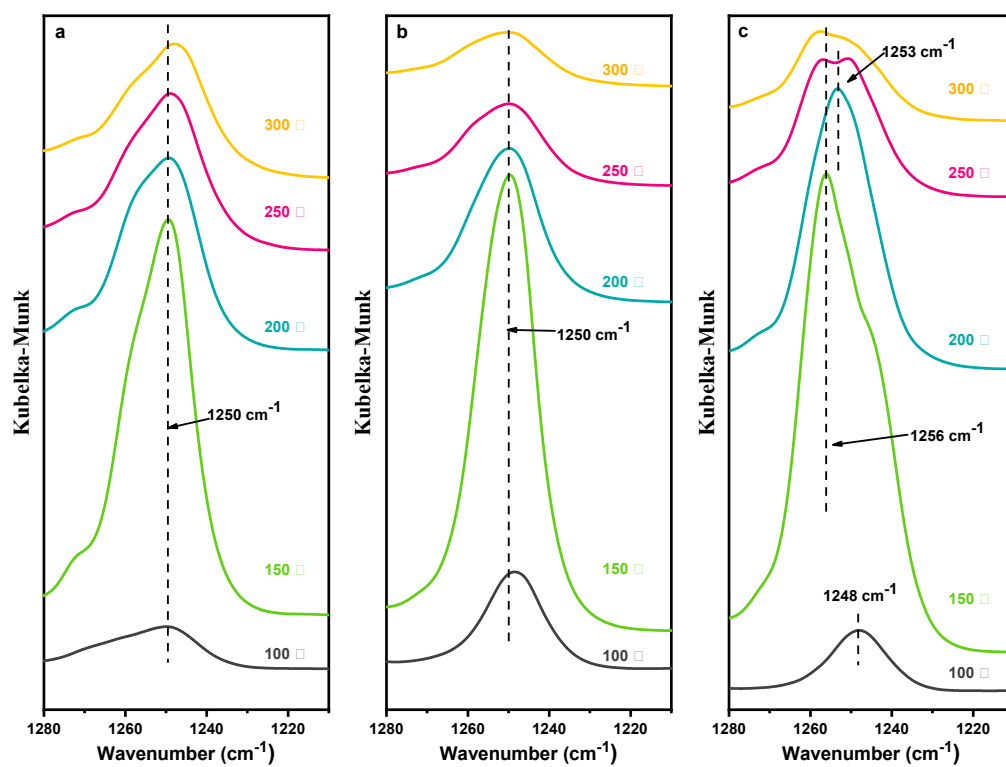

**Figure S2.** In-situ DRIFT spectra of adsorption of 1-(4-methoxyphenyl)-ethanol over three catalysts and standard spectrum.

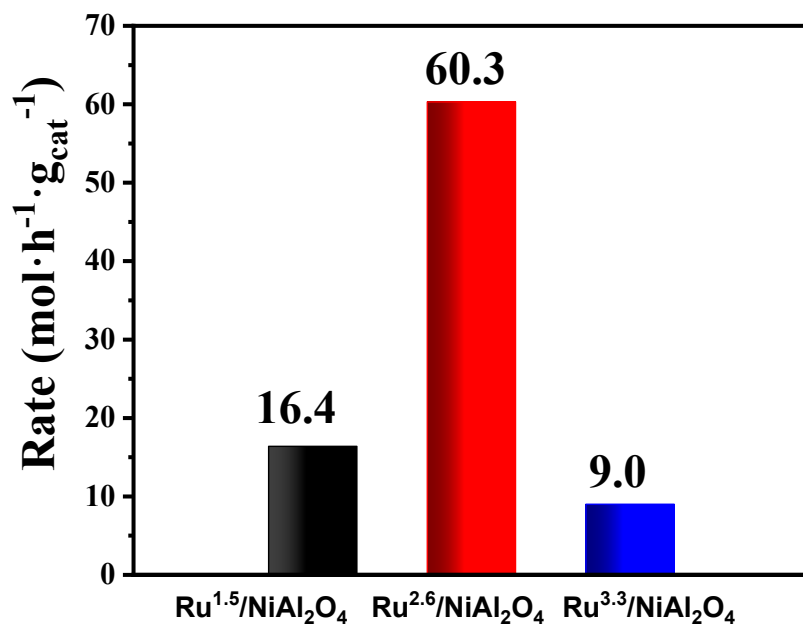

**Figure S3.** Demethoxylation rate of 4-EG catalyzed by Ru particle catalyst at 250 °C.

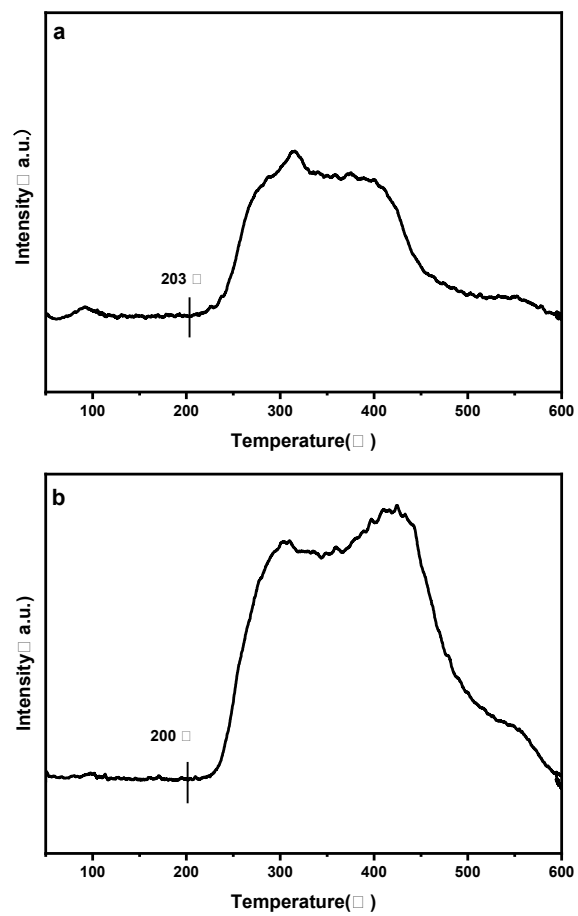

**Figure S4.** H<sub>2</sub>-TPD profiles of (a) Ru<sup>1.5</sup>/NiAl<sub>2</sub>O<sub>4</sub> and (b) Ru<sup>2.6</sup>/NiAl<sub>2</sub>O<sub>4</sub>.

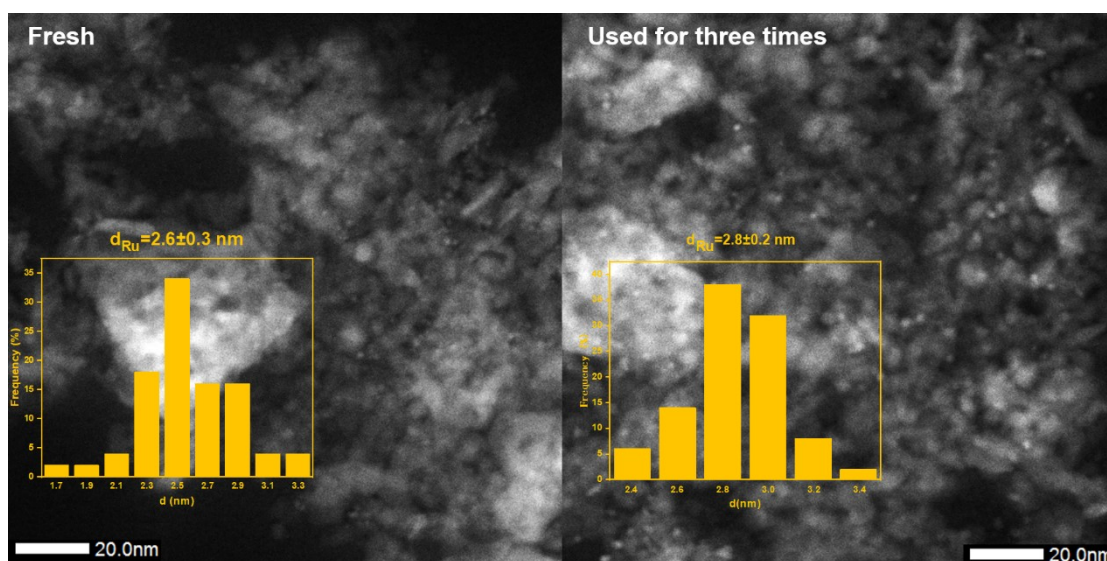

Figure S5. STEM images of Ru<sup>2.6</sup>/NiAl<sub>2</sub>O<sub>4</sub> before and after used for three times.

**Table S1.** Monomer yields of birch lignin oil over three Ru NPs catalysts <sup>a</sup>.

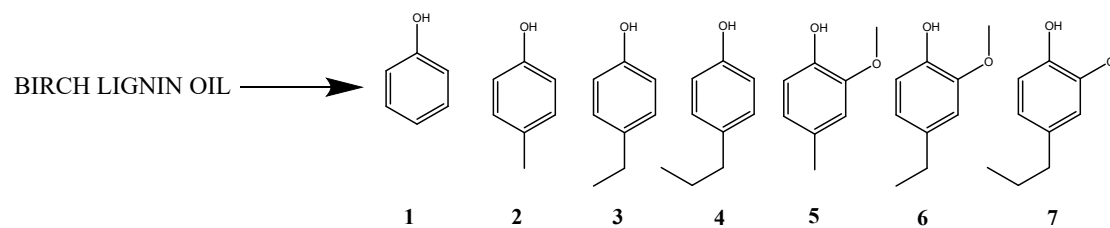

| Catalyst                                            | Monomer yield (wt%) |   |     |     |     |     |     | Total monomers<br>yield<br>(wt%) |
|-----------------------------------------------------|---------------------|---|-----|-----|-----|-----|-----|----------------------------------|
|                                                     | 1                   | 2 | 3   | 4   | 5   | 6   | 7   |                                  |
| Ru <sup>1.5</sup> /NiAl <sub>2</sub> O <sub>4</sub> | -                   | - | 1.9 | 1.4 | 0.8 | 3.6 | 2.9 | 33.9                             |
| Ru <sup>2.6</sup> /NiAl <sub>2</sub> O <sub>4</sub> | -                   | - | 2.5 | 2.4 | 0.5 | 5.0 | 5.1 | 44.5                             |
| Ru <sup>3.0</sup> /NiAl <sub>2</sub> O <sub>4</sub> | -                   | - | 0.4 | 0.1 | 0.7 | 0.3 | 0.4 | 5.8                              |

<sup>a</sup> Reaction condition : 0.08 g catalyst, 0.1 g birch lignin oil, 15 mL H<sub>2</sub>O, 2 MPa N<sub>2</sub>, 290 °C, 20 h.

**Table S2.** Comparison of experimental results from different works.

| Substrate                            | Catalyst                                                        | Reaction Conditions                                                  | Yield (%)                             | Reference |
|--------------------------------------|-----------------------------------------------------------------|----------------------------------------------------------------------|---------------------------------------|-----------|
| Birch Lignin Oil                     | Ru <sup>2.6</sup> /NiAl <sub>2</sub> O <sub>4</sub>             | 290 °C, 2 MPa N <sub>2</sub> , 20 h, H <sub>2</sub> O                | Total Monomers Yield, 44.5%           | This work |
| C-Lignin                             | Ru/ZnO/C                                                        | 200 °C, 3 MPa H <sub>2</sub> , 4h,<br>methanol                       | Catechol, 66%                         | 1         |
| Alkaline Lignin                      | Ni <sub>0.2</sub> Co <sub>2.8</sub> O <sub>4</sub>              | 250 °C, 2 bar H <sub>2</sub> , 5 h, ethanol<br>and sopropanol        | G-type and S-type Phenolics,<br>48.3% | 2         |
| Lignin                               | Br-Ru/C                                                         | 180 °C, 5 bar H <sub>2</sub> , 6 h,<br>methanol                      | Mono-aromatic Product, 26.2%          | 3         |
| Lignin                               | Ni-Fe-<br>Mo <sub>2</sub> C/AC                                  | 260 °C, 3 MPa H <sub>2</sub> , 4 h,<br>H <sub>2</sub> O/methanol=4/1 | Phenolic Monomers, 35.53%             | 4         |
| Birch Lignin                         | Ru/CNT                                                          | 220 °C, 30 atm H <sub>2</sub> , 4 h,<br>methanol                     | Aromatic Phenols, 46.0%               | 5         |
| Kraft Lignin                         | Fe-Fe <sub>3</sub> C/C                                          | 290 °C, 0.5 MPa N <sub>2</sub> , 5 h,<br>supercritical ethanol       | Lignin Oil, 48%                       | 6         |
| Sinocalamus Oldhami<br>Alkali Lignin | NaOH+Na <sub>2</sub> SO <sub>3</sub><br>+Ni-W <sub>2</sub> C/AC | 260 °C, 5 h, H <sub>2</sub> O                                        | Monophenol, 17.18%                    | 7         |
| Beech Dioxasolv<br>Lignin            | WO <sub>x</sub> /C<br>(N <sub>2</sub> -1000)                    | 200 °C, 1 MPa H <sub>2</sub> , 6 h,<br>methanol                      | Total Monomers Yield, 10.8%           | 8         |



**Table S3.** Ru contents of Ru<sup>2.6</sup>/NiAl<sub>2</sub>O<sub>4</sub> before and after used for three times.

| Catalyst Status | Ru Contents <sup>a</sup> (wt%) |
|-----------------|--------------------------------|
| Fresh           | 0.64                           |
| Used-3 times    | 0.58                           |

<sup>a</sup> Measured by ICP-OES.

## References

1. S. Wang, K. Zhang, H. Li, L. P. Xiao and G. Song, *Nat. Commun.*, 2021, **12**, 416.
2. Y. Qi, X. Xiao, Y. Mei, L. Xiong, L. Chen, X. Lin, Z. Lin, S. Sun, B. Han, D. Yang, Y. Qin and X. Qiu, *Adv. Funct.*, 2022, **32**, 2111615.
3. D. Wu, Q. Wang, O. V. Safonova, D. V. Peron, W. Zhou, Z. Yan, M. Marinova, A. Y. Khodakov and V. V. Ordonsky, *Angew. Chem. Int. Ed. Engl.*, 2021, **60**, 12513-12523.
4. B. Yan, X. Lin, Z. Chen, Q. Cai and S. Zhang, *Bioresour. Technol.*, 2021, **321**, 124503.
5. S. Su, L. P. Xiao, X. Chen, S. Wang, X. H. Chen, Y. Guo and S. R. Zhai, *ChemSusChem*, 2022, DOI: 10.1002/cssc.202200365.
6. C. Li, J. Shi, K. Zhang, Y. Wang, Z. Tang and M. Chen, *Fuel*, 2022, **315**, 123249.
7. X. Lin, L. Chen, H. Li, Y. Lv, Y. Liu, X. Lu and M. Liu, *Bioresour. Technol.*, 2021, **333**, 125136.
8. H. Guo, Z. Qi, Y. Liu, H. Xia, L. Li, Q. Huang, A. Wang and C. Li, *Catal. Sci. & Technol.*, 2019, **9**, 2144-2151.
